# Supplementary material for: Seroprevalence of canine distemper virus (CDV) in the free-roaming dog (Canis familiaris) population surrounding Chitwan National Park, Nepal
Source: PubMed Central journal article supplement (PMC9970093; doi:10.1371/journal.pone.0281542), 2023-02-27
Supplement: pone.0281542.s002.pdf [file pone.0281542.s002.pdf]

Diagnostik MEGACOR

Internal comparison study

Date: September 2013

**FASTest® CDV AB versus serum neutralisation**

|                                         | Serum neutralisation<br>positive | Serum neutralisation<br>negative |                       |
|-----------------------------------------|----------------------------------|----------------------------------|-----------------------|
| <b>FASTest® CDV AB</b><br>Test positive | <b>260</b><br>A = TP             | <b>0</b><br>B = FP               | <b>260</b><br>A+B     |
| <b>FASTest® CDV AB</b><br>Test negative | <b>0</b><br>C = FN               | <b>26</b><br>D = TN              | <b>26</b><br>C+D      |
|                                         | <b>260</b><br>A+C                | 26<br>B+D                        | <b>286</b><br>A+B+C+D |

**SUMMARY:**

In total 286 sera (260 positive and 26 negative sera tested with serum neutralisation) were compared.

**FASTest® CDV AB:**

**Sensitivity (A/(A+C):** proportion of „true positive“ (TP) of all sick animals **100%**

**Specificity (D/(B+D):** proportion of „true negative“ (TN) of all not sick animals **100%**

**Positive Predictive Value: A/(A+B):** proportion of TP of all test-positive animals **100%**

**Negative Predictive Value: D/(C+D):** proportion of TN of all test-negative animals **100%**
